# Supplementary material for: Anemopsis californica Attenuates Photoaging by Regulating MAPK, NRF2, and NFATc1 Signaling Pathways
Source: MDPI journal article supplement (doi:10.3390/antiox10121882), 2021-11-25
Supplement: s1 [file s1]

**Table S1. HPLC method for the identification of AC extract**

| <b>Elution condition</b> | <b>Tannic acid</b>     | <b>Chlorogenic acid and apigenin</b> |
|--------------------------|------------------------|--------------------------------------|
| <b>Mobile phase A</b>    | 0.1% formic acid in DW | 0.1% formic acid in DW               |
| <b>Mobile phase B</b>    | acetonitrile           | 0.1% formic acid in acetonitrile     |
| <b>Gradient linear</b>   | 8% B to 95% B          | 5% B to 40% B                        |
| <b>Retention time</b>    | 40 mins                | 50 mins                              |
| <b>UV detection</b>      | 272 nm                 | 360 nm                               |

**Table S2. Oligonucleotide primers used for RT-PCR**

| NCBI<br>accession code | Primer <sup>a</sup>         |          | Sequences (5'-3')                 |
|------------------------|-----------------------------|----------|-----------------------------------|
| XM_011526432.2         | Human GAPDH                 | Sense    | ACC ACA GTC CAT GCC ATC AC        |
|                        |                             | Antisene | CCA CCA CCC TGT TGC TGT AG        |
| NM_001145938.2         | Human MMP-1                 | Sense    | ATT CTA CTG ATA TCG GGG CTT TGA   |
|                        |                             | Antisene | ATG TCC TTG GGG TAT CCG TGT AG    |
| NM_000088.4            | Human procollagen<br>type I | Sense    | CTC GAG GTG GAC ACC ACC CT        |
|                        |                             | Antisene | CAG CTG GAT GGC CAC ATC GG        |
| NM_000660.7            | Human TGFβ-1                | Sense    | GCC CTG GAC ACC AAC TAT TGC       |
|                        |                             | Antisene | GCT GCA CTT GCA GGA GCG CAC       |
| XM_036165840.1         | Rat GAPDH                   | Sense    | TGA TGA CAT CAA GAA GGT GGT GAA G |
|                        |                             | Antisene | TCC TTG GAG GCC ATG TAG GCC AT    |
| NM_001313922.1         | Rat iNOS                    | Sense    | CCT CCT CCA CCC TAC CAA GT        |
|                        |                             | Antisene | CAC CCA AAG TGC TTC AGT CA        |
| NM_011198.4            | Rat COX-2                   | Sense    | ACT CAC TCA GTT TGT TGA GTC ATT C |
|                        |                             | Antisene | TTT GAT TAG TAC TGT AGG GTT AAT G |
| NM_008361.4            | Rat IL-1β                   | Sense    | TGC AGA GTT CCC CAA CTG GTA CAT C |
|                        |                             | Antisene | GTG CTG CCT AAT GTC CCC TTG AAT C |
| NM_001314054.1         | Rat IL-6                    | Sense    | CTG CAA GAG ACT TCC ATC CAG       |
|                        |                             | Antisene | AGT GGT ATA GAC AGG TCT GTT GG    |
| NM_001278601.1         | Rat TNF-α                   | Sense    | TCT CAT CAG TTC TAT GGC CC        |
|                        |                             | Antisene | GGG AGT AGA CAA GGT ACA AC        |

<sup>a</sup>: Primer design based on the NCBI/Primer-BLAST tool with standard parameters

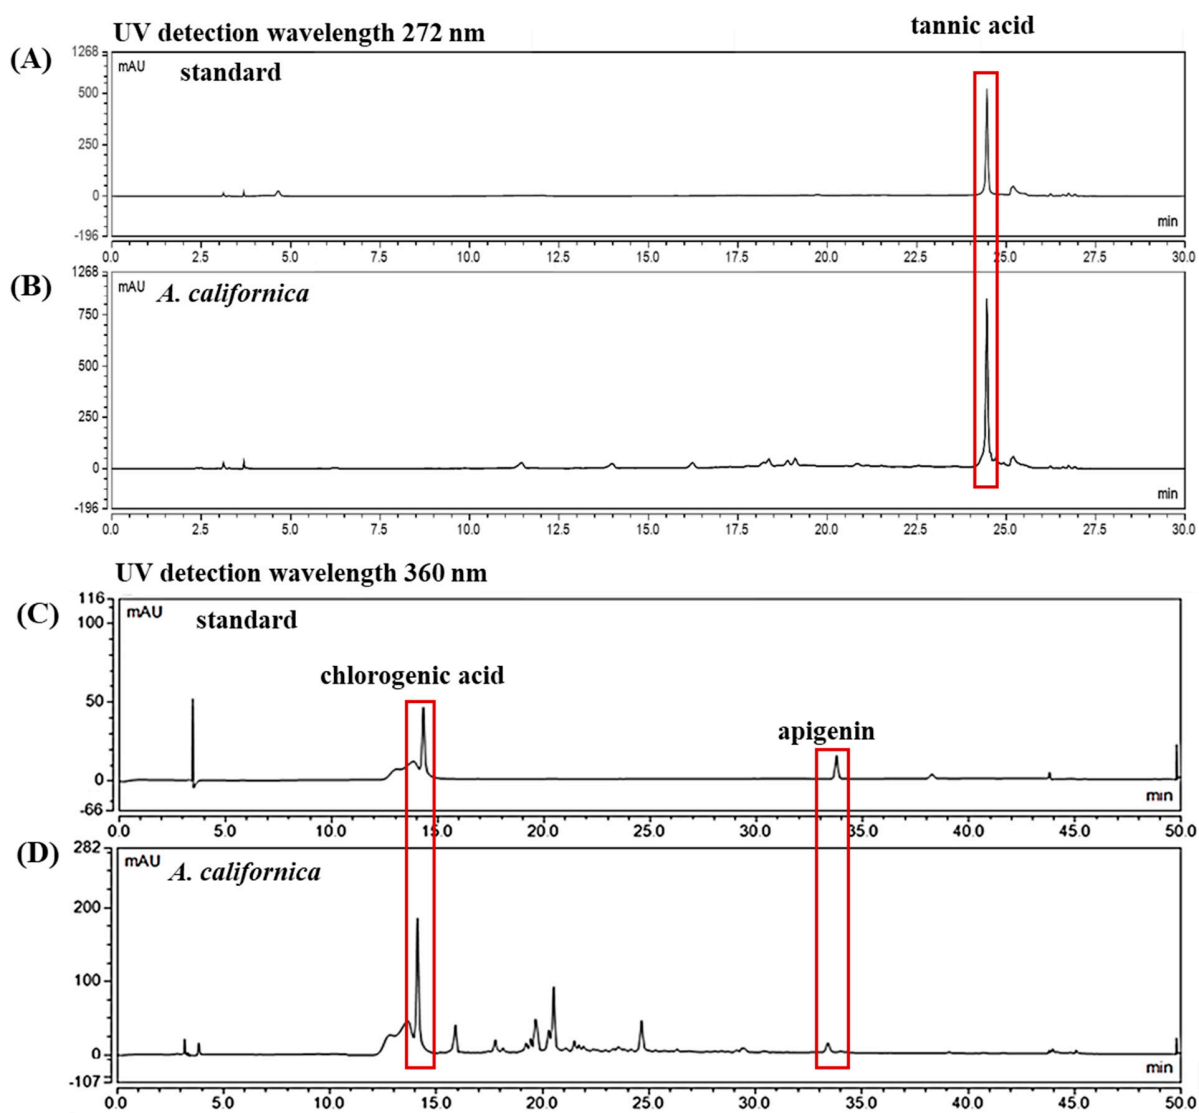

Figure S1. HPLC analysis of standard tannic acid (A) and *A. californica* extract (B) at 272 nm. HPLC analysis of standard chlorogenic acid and apigenin (C) and *A. californica* extract (D) at 360 nm.
